# Supplementary material
Source: PubMed Central journal article supplement (PMC8095131)
Supplement: advancesADV2020004118-suppl1.pdf [file advancesADV2020004118-suppl1.pdf]

**Supplemental Data****Supplementary Table 1.** Quality appraisal**Supplementary Figure 1.** Funnel plot of standard error by Log odds ratio.**Supplementary Figure 2.** Sensitivity analysis excluding the MARINER study. Forest plot showing pooled risk ratio of (A) Total Venous Thromboembolism, (B) Clinically Relevant Bleeding in patients receiving extended-duration vs. standard duration thromboprophylaxis.

Supplementary Table 1. Quality appraisal

|                                                                                                                                            | EXCLAIM 2010 | MAGELLAN 2013 | APEX 2016 | MARINER 2018 |
|--------------------------------------------------------------------------------------------------------------------------------------------|--------------|---------------|-----------|--------------|
| <b>Domain 1: Risk of bias arising from the randomization process</b>                                                                       |              |               |           |              |
| 1.1 Was the allocation sequence random?                                                                                                    | Yes          | Yes           | Yes       | Yes          |
| 1.2 Was the allocation sequence concealed until participants were enrolled and assigned to interventions?                                  | Yes          | Yes           | Yes       | Yes          |
| 1.3 Did baseline differences between intervention groups suggest a problem with the randomization process?                                 | No           | No            | No        | No           |
| <b>Risk-of-bias judgement</b>                                                                                                              | Low          | Low           | Low       | Low          |
| <b>Domain 2: Risk of bias due to deviations from the intended interventions (<i>effect of assignment to intervention</i>)</b>              |              |               |           |              |
| 2.1. Were participants aware of their assigned intervention during the trial?                                                              | No           | No            | No        | No           |
| 2.2. Were carers and people delivering the interventions aware of participants' assigned intervention during the trial?                    | No           | No            | No        | No           |
| 2.3. <u>If Y/PY/NI to 2.1 or 2.2:</u> Were there deviations from the intended intervention that arose because of the experimental context? | -            | -             | -         | -            |
| 2.4. <u>If Y/PY to 2.3:</u> Were these deviations from intended intervention balanced between groups?                                      | -            | -             | -         | -            |
| 2.5 <u>If N/PN/NI to 2.4:</u> Were these deviations likely to have affected the outcome?                                                   | -            | -             | -         | -            |
| 2.6 Was an appropriate analysis used to estimate the effect of assignment to intervention?                                                 | Yes          | Yes           | Yes       | Yes          |

|                                                                                                                                                                                | EXCLAIM 2010 | MAGELLAN 2013 | APEX 2016 | MARINER 2018 |
|--------------------------------------------------------------------------------------------------------------------------------------------------------------------------------|--------------|---------------|-----------|--------------|
| 2.7 <u>If N/PN/NI to 2.6</u> : Was there potential for a substantial impact (on the result) of the failure to analyse participants in the group to which they were randomized? | -            | -             | -         | -            |
| <b>Risk-of-bias judgement</b>                                                                                                                                                  | Low          | Low           | Low       | Low          |
| <b>Domain 3: Missing outcome data</b>                                                                                                                                          |              |               |           |              |
| 3.1 Were data for this outcome available for all, or nearly all, participants randomized?                                                                                      | Probably no  | No            | No        | Probably no  |
| 3.2 <u>If N/PN/NI to 3.1</u> : Is there evidence that result was not biased by missing outcome data?                                                                           | Yes          | No            | No        | Yes          |
| 3.3 <u>If N/PN to 3.2</u> : Could missingness in the outcome depend on its true value?                                                                                         | -            | No            | No        | -            |
| 3.4 <u>If Y/PY/NI to 3.3</u> : Do the proportions of missing outcome data differ between intervention groups?                                                                  | -            | -             | -         | -            |
| 3.5 <u>If Y/PY/NI to 3.3</u> : Is it likely that missingness in the outcome depended on its true value?                                                                        | -            | -             | -         | -            |
| <b>Risk-of-bias judgement</b>                                                                                                                                                  | Low          | Low           | Low       | Low          |
| <b>Domain 4: Risk of bias in measurement of the outcome</b>                                                                                                                    |              |               |           |              |
| 4.1 Was the method of measuring the outcome inappropriate?                                                                                                                     | No           | No            | No        | No           |
| 4.2 Could measurement or ascertainment of the outcome have differed between intervention groups ?                                                                              | No           | No            | No        | No           |
| 4.3 <u>If N/PN/NI to 4.1 and 4.2</u> : Were outcome assessors aware of the intervention received by study participants ?                                                       | -            | -             | -         | -            |

|                                                                                                                                                   | EXCLAIM 2010 | MAGELLAN 2013 | APEX 2016    | MARINER 2018 |
|---------------------------------------------------------------------------------------------------------------------------------------------------|--------------|---------------|--------------|--------------|
| 4.4 If Y/PY/NI to 4.3: Could assessment of the outcome have been influenced by knowledge of intervention received?                                | -            | -             | -            | -            |
| 4.5 If Y/PY/NI to 4.4: Is it likely that assessment of the outcome was influenced by knowledge of intervention received?                          | -            | -             | -            | -            |
| <b>Risk-of-bias judgement</b>                                                                                                                     | Low          | Low           | Low          | Low          |
| <b>Domain 5: Risk of bias in selection of the reported result</b>                                                                                 |              |               |              |              |
| 5.1 Was the trial analysed in accordance with a pre-specified plan that was finalized before unblinded outcome data were available for analysis ? | Yes          | Yes           | Yes          | Yes          |
| Is the numerical result being assessed likely to have been selected, on the basis of the results, from...                                         |              |               |              |              |
| 5.2. ... multiple outcome measurements (e.g. scales, definitions, time points) within the outcome domain?                                         | Yes          | Yes           | Yes          | Yes          |
| 5.3 ... multiple analyses of the data?                                                                                                            | Yes          | Yes           | Yes          | Yes          |
| <b>Risk-of-bias judgement</b>                                                                                                                     | Some concern | Some concern  | Some concern | Some concern |
| <b>Overall risk of bias</b>                                                                                                                       |              |               |              |              |
| <b>Risk-of-bias judgement</b>                                                                                                                     | Low          | Low           | Low          | Low          |

**Supplementary Figure 1.** Funnel plot of standard error by Log odds ratio

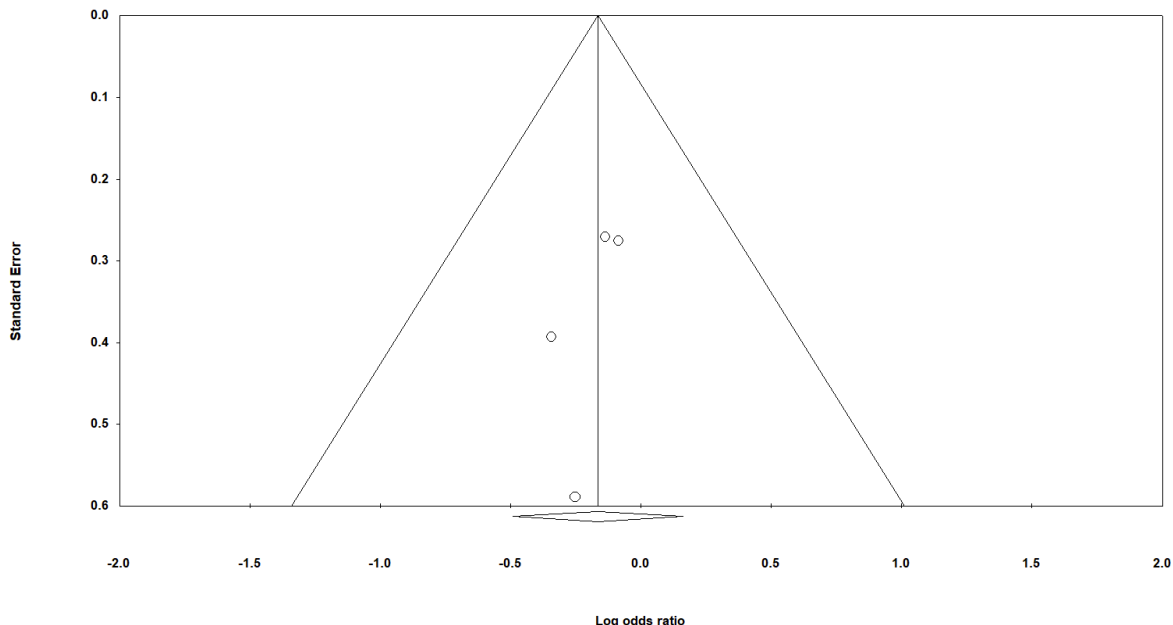

**Supplementary Figure 2.** Sensitivity analysis excluding the MARINER study. Forest plot showing pooled risk ratio of (A) Total Venous Thromboembolism, (B) Clinically Relevant Bleeding in patients receiving extended-duration vs. standard duration thromboprophylaxis.

**A. Total VTE**

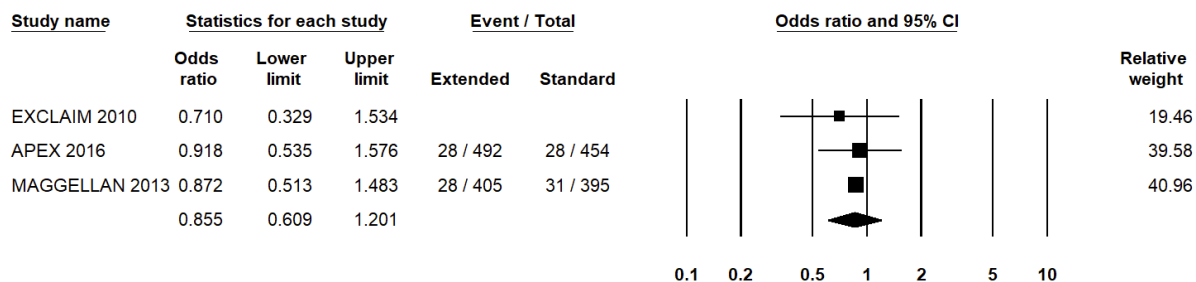

Heterogeneity: df = 2 (P = 0.86); I<sup>2</sup> = 0%

**B. Clinically relevant bleeding**

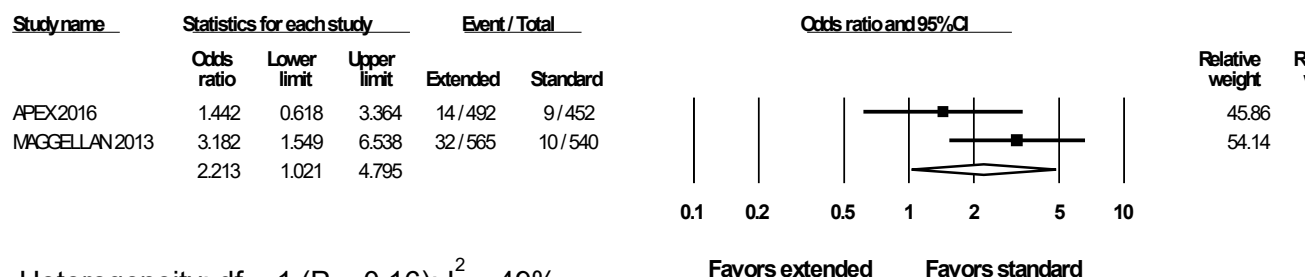

Heterogeneity: df = 1 (P = 0.16); I<sup>2</sup> = 49%
